# Supplementary material
Source: PubMed Central journal article supplement (PMC5116393)
Supplement: NIHMS828321-supplement-Supplemental_Data.pdf [file NIHMS828321-supplement-Supplemental_Data.pdf]

## **Supplemental information**

**ManLMN is a glucose transporter and central metabolic regulator in *Streptococcus pneumoniae***

Eleanor Fleming and Andrew Camilli\*

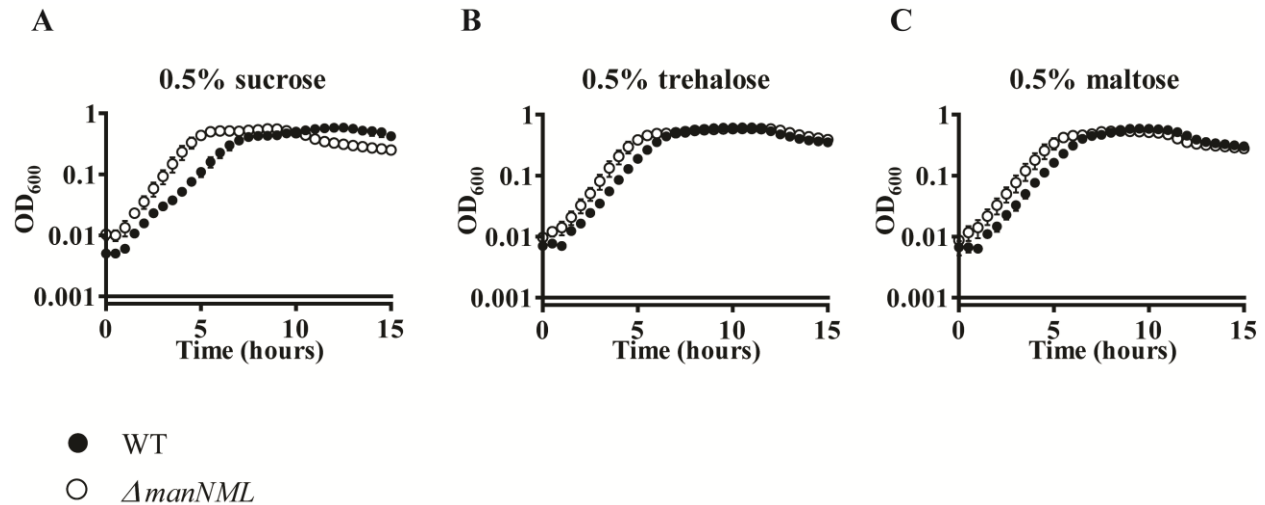

**Supplemental figure 1. The  $\Delta manLMN$  strain grows like WT on sucrose and glucose disaccharides**

WT (closed circles) and  $\Delta manLMN$  (open circles) were grown in chemically defined medium (CDM) with 0.5% final concentration of one of the following carbohydrates; sucrose (**A**), trehalose (**B**), and maltose (**C**). Absorbance at 600 nm was measured every 30 minutes over the course of 15 hours of growth at 37°C. Each data point represents the average of at least six biological replicates from at least two separate days. Error bars represent the standard error of the mean (SEM).

**A**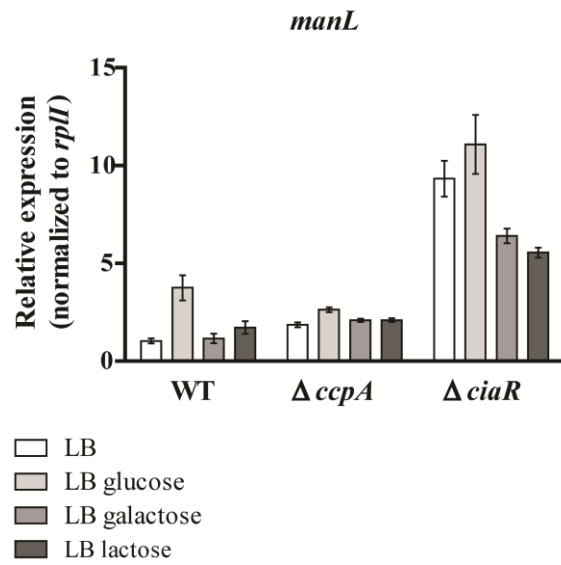**B**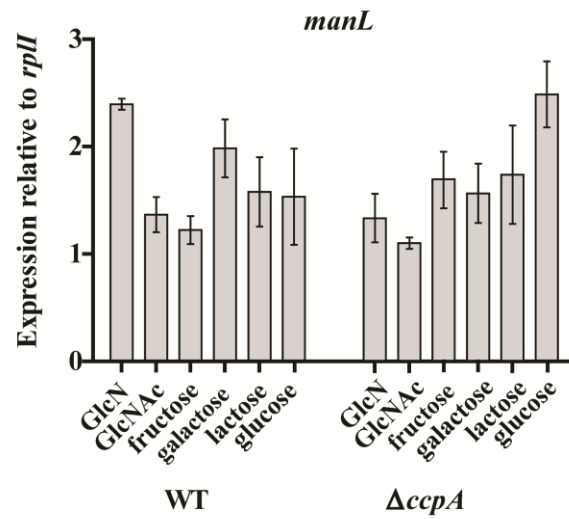

### Supplemental figure 2. Additional transcriptional analysis of *manLMN*

Transcription of *manL* as a representative of the *manLMN* operon was quantified by quantitative reverse transcriptase PCR (qRT-PCR), during mid-exponential growth of WT and  $\Delta ccpA$  in CDM with 0.5% GlcN, GlcNAc, fructose, galactose, lactose, or glucose (**A**). Transcription of *manL* was also assessed during mid-exponential growth of WT,  $\Delta ccpA$ , and  $\Delta ciaR$  in LB and LB with added glucose, galactose, or lactose (**B**). Each bar represents the average of at least five biological replicates collected over multiple days normalized to *rplI*. Error bars represent the SEM. In **B**, values are reported relative to WT in plain LB.

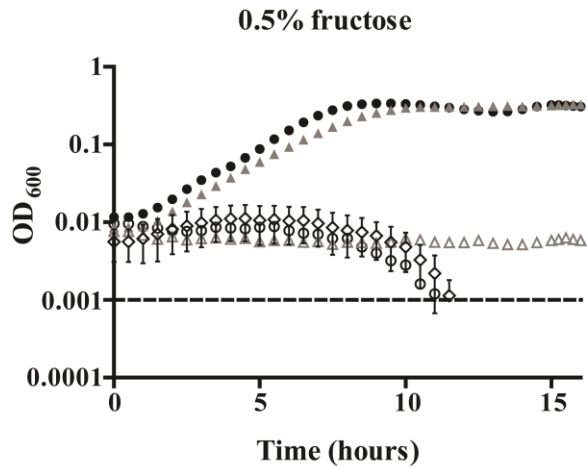

- WT
- $\Delta manLMN$
- ▲  $\Delta fru PTS$
- △  $\Delta manLMN \Delta fru PTS$
- ◇  $\Delta manLMN \Delta fru PTS + fru PTS$  complemented in trans

**Supplemental figure 3. Constitutive expression of fructose-specific PTS system does not rescue growth of  $\Delta manLMN$  in fructose**

Growth of the ManLMN-fru PTS double deletion strain ( $\Delta manLMN \Delta fru PTS$ ) and its corresponding complemented strain ( $\Delta manLMN \Delta fru PTS + fru PTS$  complemented in trans) was compared to growth of WT and  $\Delta manLMN$  in fructose. Optical density readings were taken every 30 minutes over the course of 15 hours at 37°C. Each data point represents the average of six biological replicates collected on multiple days and error bars represent the SEM, for all samples except the WT and  $\Delta manLMN$  controls for which one representative replicate is shown.

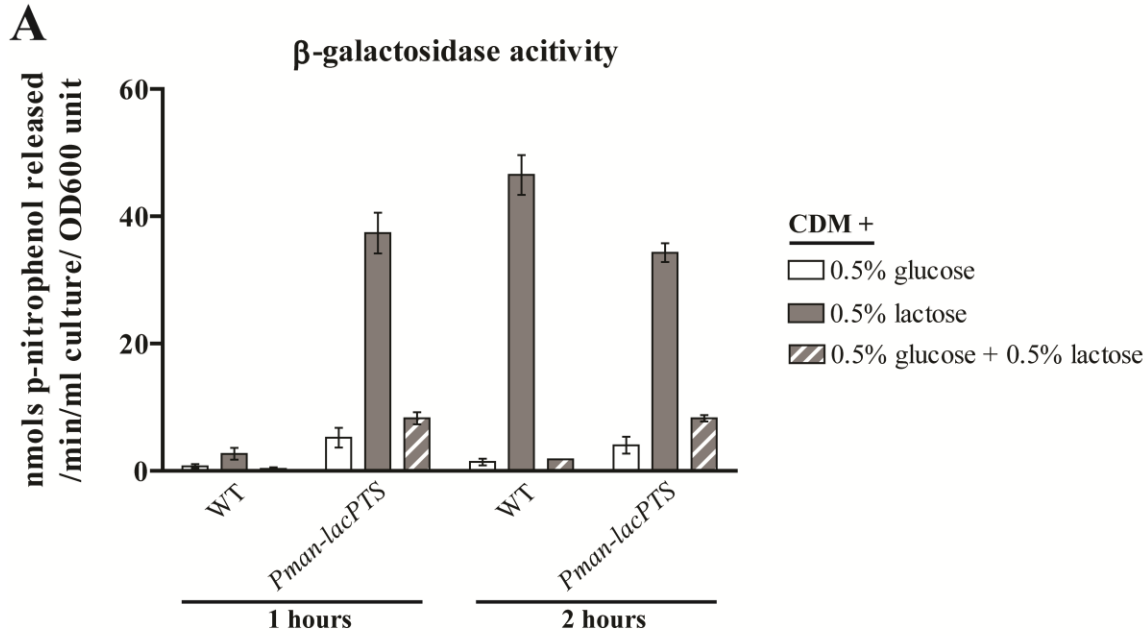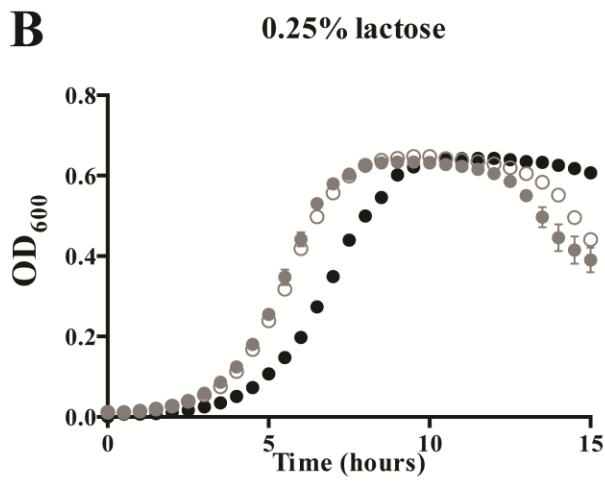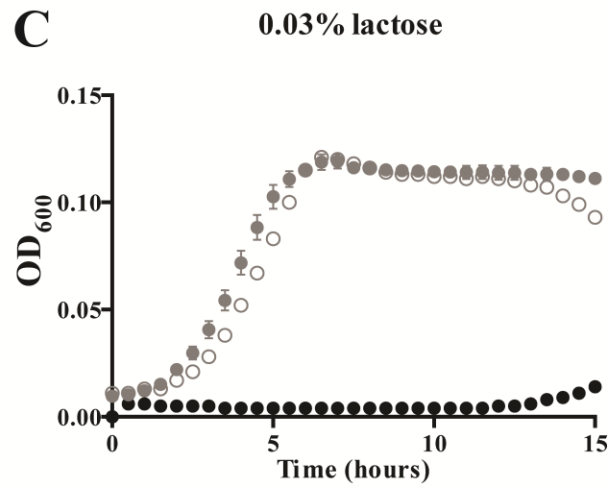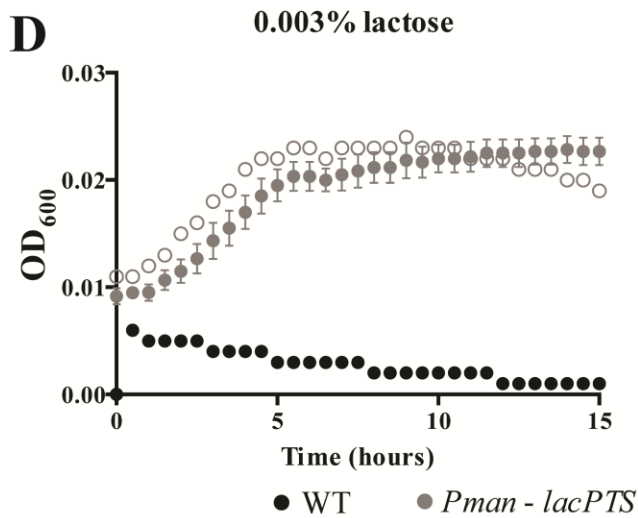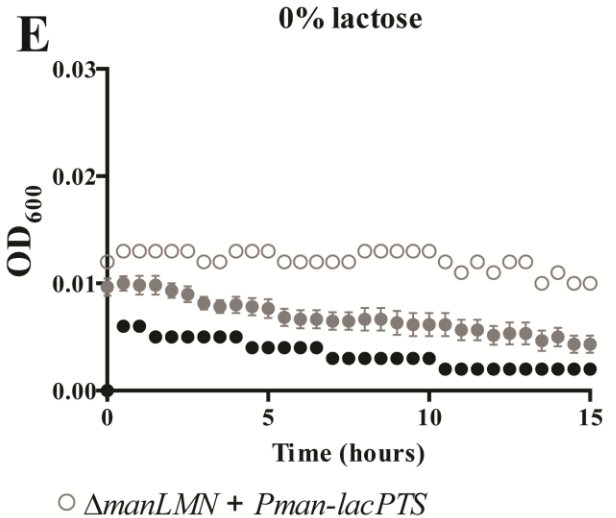

**Supplemental figure 4. Constitutive expression of the lac PTS alone does not prevent CCR of  $\beta$ -galactosidase activity**

(A) Mid-exponential THY cultures of WT and  $\Delta lac PTS + lac PTS$  complemented *in trans* ( $P_{man} - lac PTS$ ) were washed and switched to CDM containing 0.5% glucose, 0.5% lactose or 0.5% glucose + 0.5% lactose. Samples were collected one and two hours after switching to the CDM conditions. Each bar represents the average of five biological replicates collected on multiple days. Error bars represent the SEM. Growth of the  $P_{man} - lac PTS$  (grey closed circles) strain compared to WT (closed black circles), and  $\Delta manLMN \Delta lac PTS + lac PTS$  complemented *in trans* was analyzed in the following limiting lactose conditions; 0.25% lactose (B), 0.03% lactose (C), 0.003% lactose (D), and 0% lactose (E). Optical density readings were taken every 30 minutes over the course of 15 hours at 37°C. Each data point represents the average of six biological replicates collected on two separate days and error bars represent the SEM, for all samples except the WT and  $\Delta manLMN \Delta lac PTS + lac PTS$  complemented *in trans* controls for which one representative replicate is shown.

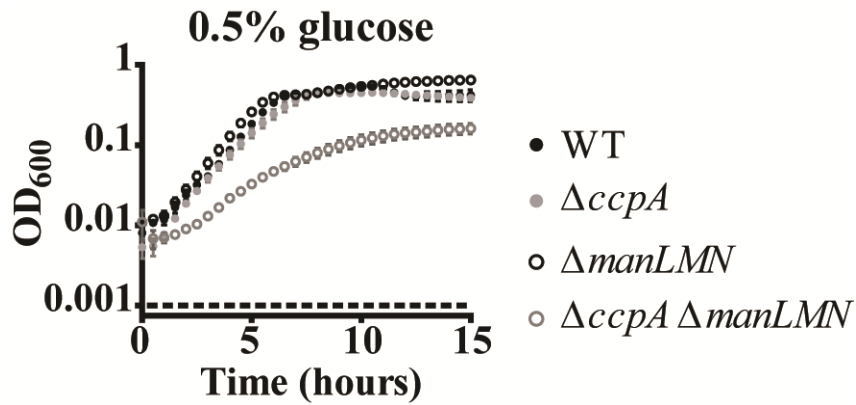

**Supplemental figure 5. The  $\Delta manLMN \Delta ccpA$  strain has a defect for growth in glucose**

Growth of WT,  $\Delta manLMN$ ,  $\Delta ccpA$  and  $\Delta manLMN \Delta ccpA$  in 0.5% glucose CDM was monitored by recording the absorbance at 600 nm every 30 minutes over the course of 15 hours of growth at 37°C.

Each data point represents the average of at least six biological replicates collected on multiple days and error bars represent the SEM.

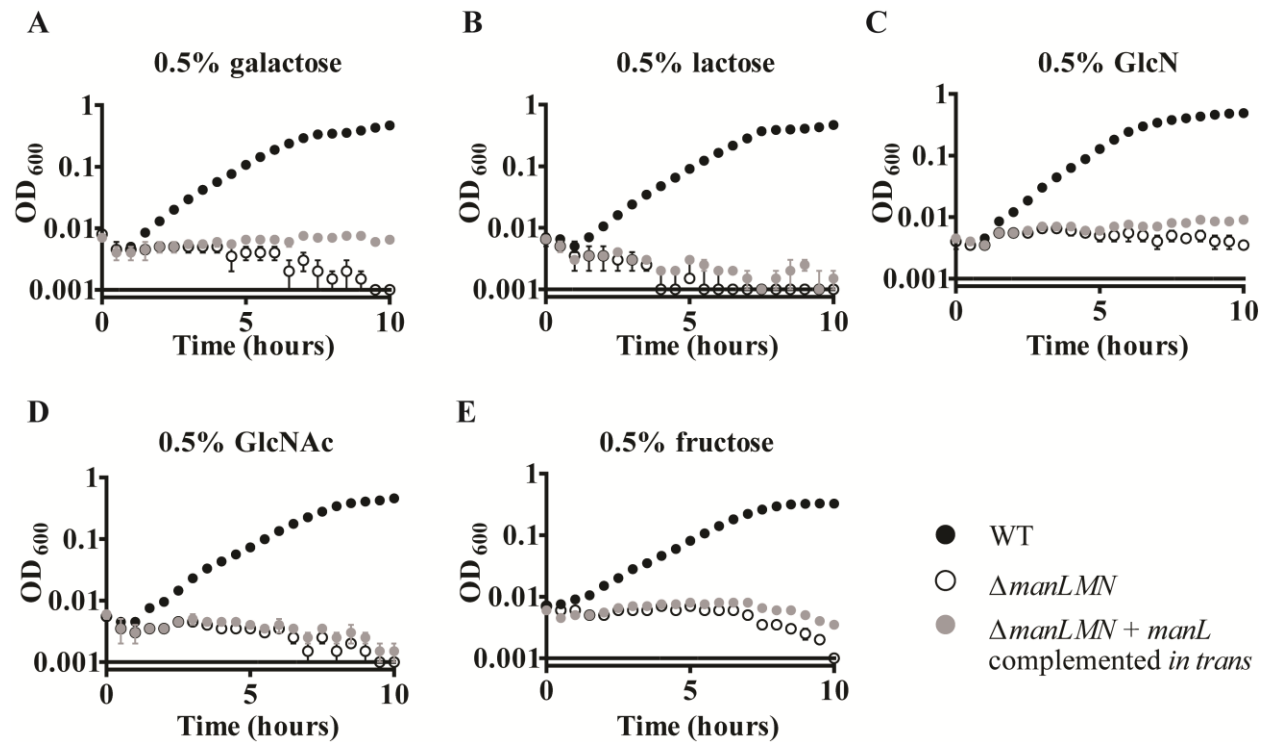

**Supplemental figure 6. Complementation *in trans* with *manL* is not sufficient to restore growth to  $\Delta manLMN$**

WT,  $\Delta manLMN$ , the *manL* complemented strain were grown in chemically defined medium (CDM) with 0.5% final concentration of one of the following carbohydrates; galactose (**A**), lactose (**B**), GlcN (**C**), GlcNAc (**D**), or fructose (**E**). Absorbance at 600 nm was measured every 30 minutes over the course of 15 hours of growth at 37°C. Each data point represents the average of at least six biological replicates from at least two separate days. Error bars represent the standard error of the mean (SEM).



A

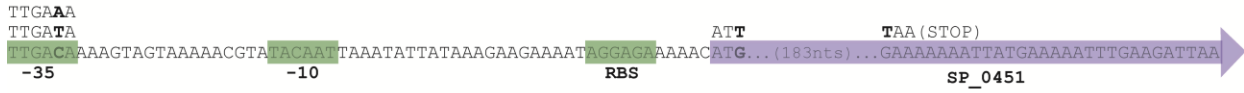

B

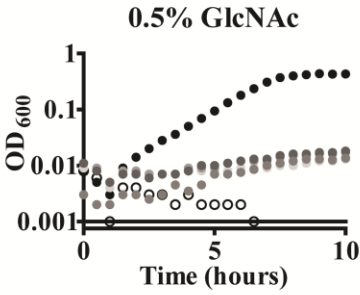

C

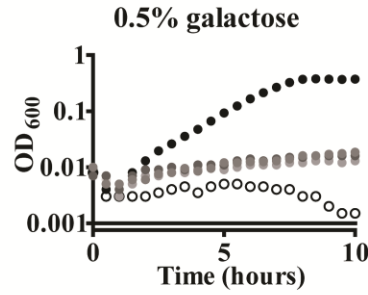

D

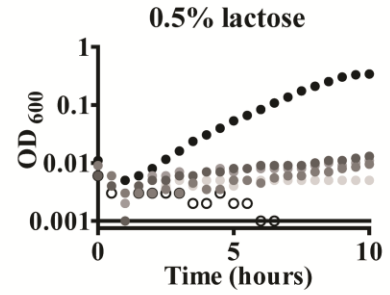

● WT ○  $\Delta manLMN$  ● GlcNAc # 2-1 ● GlcNAc # 3-1 ● GlcNAc # 4-1 ● GlcNAc # 4-2

### Supplemental figure 7. Suppressor mutations affecting SP\_0451

The location of each suppressor mutation is shown in the SP\_0451 promoter and coding region in **A**. Growth of these four suppressor isolates was compared to WT and  $\Delta manLMN$  controls in CDM with 0.5% of GlcNAc (**B**), galactose (**C**), or lactose (**D**). Each data point represents the average of at least four biological replicates collected on two separate days with error bars representing the standard error of the mean.

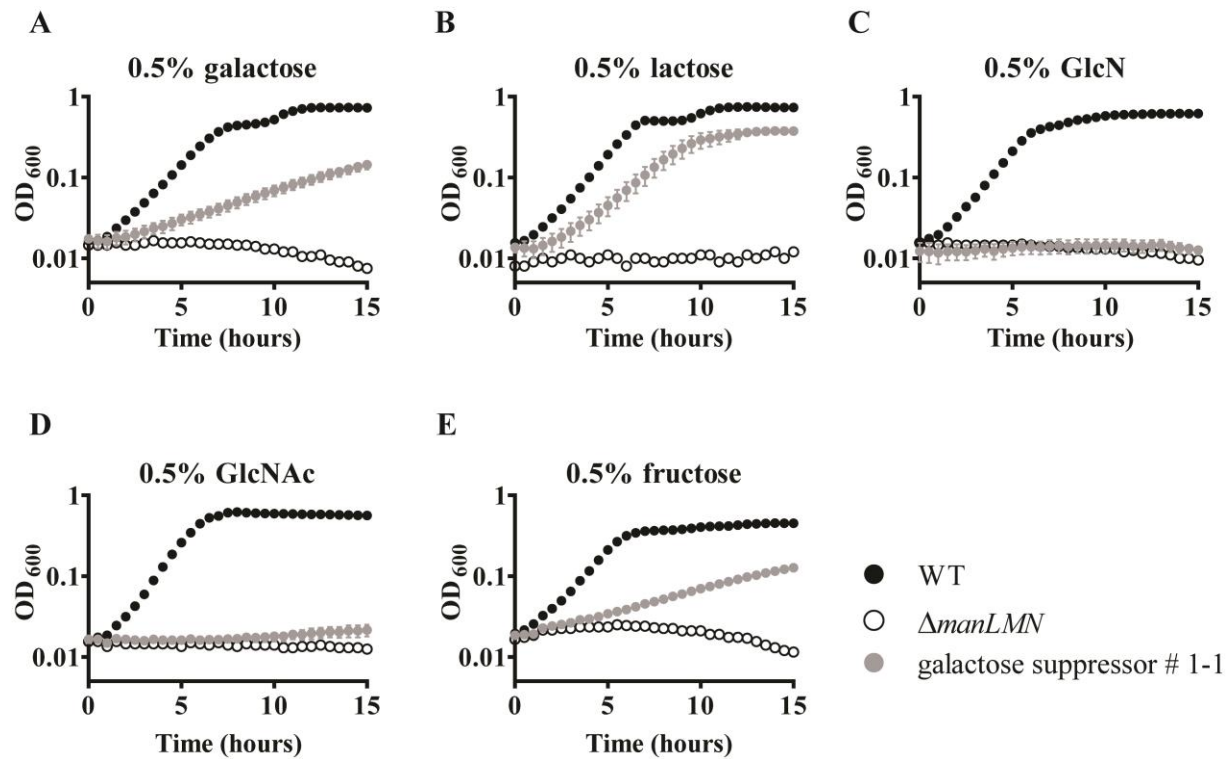

**Supplemental figure 8. Growth analysis of suppressor mutation affecting SP\_1473**

Growth of *galactose suppressor #1-1* was compared to WT and  $\Delta manLMN$  controls in CDM with 0.5% of galactose (A), lactose (B), GlcN (C), GlcNAc (D), or fructose (E). Each data point represents the average of at least four biological replicates collected on two separate days with error bars representing the standard error of the mean.

**Supplemental Table 1.**

| Promoter name           | Genomic location |         | Operon                                         | Notes                                                                                                 | Reference                     |
|-------------------------|------------------|---------|------------------------------------------------|-------------------------------------------------------------------------------------------------------|-------------------------------|
|                         | Start            | Stop    |                                                |                                                                                                       |                               |
| <i>P<sub>lacA</sub></i> | 1129831          | 1129986 | Tagatose-6-phosphate pathway; <i>lacABCD</i>   | includes validated LacR-2 binding site                                                                | Fleming <i>et al.</i> , 2015  |
| <i>P<sub>nagB</sub></i> | 1334475          | 1334624 | glucosamine-6-phosphate deaminase; <i>nagB</i> | includes predicted NagR binding site (93.75% homologous to validated <i>B. subtilis</i> binding site) | Bertram <i>et al.</i> , 2011  |
| <i>P<sub>fruR</sub></i> | 822532           | 822706  | fructose operon; <i>fruRCA</i>                 | includes predicted <i>cre</i> site and 4 predicted FruR binding motifs validated in <i>L. lactis</i>  | Barrière <i>et al.</i> , 2005 |

This chart shows the promoter regions used for the  $\alpha$ -galactosidase reporter constructs. The promoter name, genomic location in the TIGR4 genome, the gene(s) regulated by the promoter, and relevant validated or predicted transcriptional regulator binding sites are listed. *P<sub>lacA</sub>* was used to assay for galactose and lactose-dependent induction. *P<sub>nagB</sub>* was used to assay for GlcN and GlcNAc-dependent induction. *P<sub>fruR</sub>* was used to assay for fructose-dependent induction.

## References

- Barrière, C., Veiga-da-Cunha, M., Pons, N., Guedon, E., van Hijum, S.A., Kok, J., *et al.* (2005) Fructose Utilization in *Lactococcus lactis* as a Model for Low-GC Gram-Positive Bacteria: Its Regulator, Signal, and DNA-Binding Site. *J Bacteriol* **187**: 3752–3761.
- Bertram, R., Rigali, S., Wood, N., Lulko, A.T., Kuipers, O.P., and Titgemeyer, F. (2011) Regulon of the N-acetylglucosamine utilization regulator NagR in *Bacillus subtilis*. *J Bacteriol* **193**: 3525–3536.
- Fleming, E., Lazinski, D.W., and Camilli, A. (2015) Carbon catabolite repression by seryl phosphorylated HPr is essential to *Streptococcus pneumoniae* in carbohydrate rich environments. *Mol Microbiol* **97**: 360–380.

**Supplemental Table 2. Suppressor mutations that rescue growth of  $\Delta$  *manLMN***

| Strain or suppressor | Genetic background   | Consequence of mutation                                            | Predicted or verified function                        | Reference <sup>a</sup>                                 |
|----------------------|----------------------|--------------------------------------------------------------------|-------------------------------------------------------|--------------------------------------------------------|
| <i>manLMN::CHESH</i> | <i>manLMN::CHESH</i> | SP_1002 Glu208*                                                    | uncharacterized lipoprotein                           |                                                        |
| <i>manLMN::spec</i>  | <i>manLMN::spec</i>  | SP_0647 Ala165Thr                                                  | galactose PTS EIIC                                    | (Bidossi <i>et al.</i> , 2012)                         |
|                      |                      | SP_0921 Glu286*                                                    | agmatine deiminase                                    |                                                        |
|                      |                      | SP_1027 Ser95Leu                                                   | hypothetical protein                                  |                                                        |
|                      |                      | SP_1564 synonymous mutation                                        | hypothetical protein                                  |                                                        |
| gal # 1-1            | <i>manLMN::CHESH</i> | SP_0350 Gly125Asp                                                  | Cps4E, capsule biosynthesis protein                   | (Kolkman <i>et al.</i> , 1997)                         |
|                      |                      | SP_1473 start codon mutation (ATG→ATA)                             | hypothetical small protein                            |                                                        |
| gal # 1-3            | <i>manLMN::CHESH</i> | SP_1186 Ala53Asp                                                   | lac PTS EIIA                                          | (Bidossi <i>et al.</i> , 2012)                         |
| gal #1-4             | <i>manLMN::CHESH</i> | SP_1186 Ala31Asp                                                   | lac PTS EIIA                                          | (Bidossi <i>et al.</i> , 2012)                         |
| gal # 3-1            | <i>manLMN::CHESH</i> | G→C 85 bp upstream of SP_1187                                      | LacT, transcriptional antiterminator                  | Afzal <i>et al.</i> , 2014<br>Lau <i>et al.</i> , 2001 |
|                      |                      | SP_0927 Thr245Ile                                                  | SmrC, transcriptional regulator                       |                                                        |
|                      |                      | SP_1242 Val128Ile                                                  | amino acid ABC ATPase                                 |                                                        |
|                      |                      | A <sub>11</sub> →A <sub>12</sub> 48 bp upstream of SP_1773         | degenerate transposase                                |                                                        |
| gal # 3-2            | <i>manLMN::CHESH</i> | T <sub>13</sub> →T <sub>12</sub> 48 bp upstream of SP_1331 (f=57%) | phospho-sugar binding transcriptional regulator       | Obert <i>et al.</i> , 2006                             |
|                      |                      | SP_1824 Gly239Val (f=53%)                                          | ABC transporter permease                              |                                                        |
|                      |                      | SP_1772 Thr2751Ala (f=52%)                                         | PsrP, glycosylated serine rich repeat surface protein |                                                        |
| gal # 3-7            | <i>manLMN::CHESH</i> | C→T 26bp upstream of SP_0925 (f= 66%)                              | hypothetical protein                                  | Bidossi <i>et al.</i> , 2011                           |
|                      |                      | SP_1185 Val466Gly (f = 75%),                                       | lac PTS EIIB                                          |                                                        |
|                      |                      | A <sub>9</sub> →A <sub>8</sub> 79 bp upstream of SP_0138 (f=57%)   | hypothetical protein                                  |                                                        |
| GlcN # 1-3/ # 1-4    | <i>manLMN::CHESH</i> | SP_0576 Tyr266Asp                                                  | LicT, transcriptional antiterminator                  |                                                        |
|                      |                      | C→A mutation upstream of SP_0406                                   | MutS2 family protein                                  |                                                        |
| Fru # 2-3            | <i>manLMN::CHESH</i> | SP_0877 Gly37Cys                                                   | fru PTS EIIABC                                        | Bidossi <i>et al.</i> , 2011                           |
| fru #3-1             | <i>manLMN::CHESH</i> | SP_0758 promoter mutation                                          | uncharacterized PTS EIIABC                            |                                                        |

|              |                      |                                              |                                                                                                    |                                         |
|--------------|----------------------|----------------------------------------------|----------------------------------------------------------------------------------------------------|-----------------------------------------|
|              |                      | SP_1895 Gly48Val                             | raffinose ABC transporter permease                                                                 | Rosenow <i>et al.</i> , 1999            |
| fru #4-2     | <i>manLMN::CHESH</i> | SP_0877 Ala484Asp                            | fru PTS EIIABC                                                                                     | Bidossi <i>et al.</i> , 2011            |
|              |                      | SP_2112 Arg21Pro                             | maltose operon transcriptional repressor                                                           | Lacks, 1968, Puyet <i>et al.</i> , 1993 |
| GlcNAc # 1-2 | <i>manLMN::CHESH</i> | ΔT 47bp upstream of SP_1331                  | phospho-sugar binding transcriptional regulator                                                    | Martin <i>et al.</i> , 1992             |
|              |                      | SP_0369 Ala204Pro                            | PBP1A (penicillin binding protein)                                                                 |                                         |
|              |                      | SP_1000 Ala141Ser                            | thioredoxin family protein                                                                         | Fleming <i>et al.</i> , 2015            |
|              |                      | LacR-2 Gly156Cys                             | galactose operon transcriptional repressor                                                         |                                         |
|              |                      | SP_1772 Thr2751Ala                           | PsrP, glycosylated serine rich repeat surface protein                                              | Obert <i>et al.</i> , 2006              |
| GlcNAc # 1-4 | <i>manLMN::CHESH</i> | C→A 43 bp upstream of SP_0060<br>C→T SP_1769 | BgaC and galactose/GlcNAc PTS operon<br>glycosyl transferase (already has an authentic frameshift) | Jeong <i>et al.</i> , 2009              |
| GlcNAc # 2-1 | <i>manLMN::CHESH</i> | SP_0451 start codon mutation (ATG→ATT)       | hypothetical small protein                                                                         | Lau <i>et al.</i> , 2001                |
|              |                      | SP_0475 Leu53Phe                             | cellobiose PTS EIIC                                                                                |                                         |
|              |                      | SP_0927 Glu20Lys                             | SmrC, transcriptional regulator                                                                    |                                         |
| GlcNAc # 3-1 | <i>manLMN::CHESH</i> | SP_0451 Glu63*                               | hypothetical small protein                                                                         | Manso <i>et al.</i> , 2014              |
|              |                      | SP_0505 Ala51Val                             | HsdS, Type 1 restriction modification system S subunit                                             |                                         |
|              |                      | SP_1433 Ala182Asp                            | AraC family transcriptional regulator                                                              |                                         |
| GlcNAc # 4-1 | <i>manLMN::CHESH</i> | SP_0451 -35 mutation                         | hypothetical small protein                                                                         | Agarwal <i>et al.</i> , 2013            |
| GlcNAc # 4-2 | <i>manLMN::CHESH</i> | SP_0451 -35 mutation                         | hypothetical small protein                                                                         |                                         |
|              |                      | SP_1647 Asp101Ala                            | PepO, endopeptidase O                                                                              |                                         |
|              |                      | SP_2208 Arg279Ser                            | putative helicase                                                                                  |                                         |
| s.lac # 1-2  | <i>manLMN::spec</i>  | SP_0927 Thr245Ile                            | SmrC, transcriptional regulator                                                                    | Lau <i>et al.</i> , 2001                |
|              |                      | SP_0893 His8Tyr                              | putative transcriptional regulator                                                                 |                                         |
|              |                      | SP_1651 Arg64Cys                             | tpx, thiolredocine-dependent thiol peroxidase                                                      |                                         |
| s.lac # 1-3b | <i>manLMN::spec</i>  | SP_0927 Ser124Leu                            | SmrC, transcriptional regulator                                                                    | Lau <i>et al.</i> , 2001                |
| s.lac # 3-1  | <i>manLMN::spec</i>  | SP_0927 Glu20Lys                             | SmrC, transcriptional regulator                                                                    | Lau <i>et al.</i> , 2001                |
|              |                      | SP_1367 Leu224Phe                            | LicD3, lipopolysaccharide cholinephosphotransferase                                                |                                         |
|              |                      | SP_1989 Ile7Ser                              | PclR, phospholipase C transcriptional regulator                                                    |                                         |
| s.lac # 3-4  | <i>manLMN::spec</i>  | SP_0927 Thr202Ile                            | SmrC, transcriptional regulator                                                                    | Lau <i>et al.</i> , 2001                |
| s.lac # 10   | <i>manLMN::spec</i>  | SP_0927 Glu20Lys                             | SmrC, transcriptional regulator                                                                    | Lau <i>et al.</i> , 2001                |

|                |                     |                                                                                                            |                                                                                                                                                                                       |                                                             |
|----------------|---------------------|------------------------------------------------------------------------------------------------------------|---------------------------------------------------------------------------------------------------------------------------------------------------------------------------------------|-------------------------------------------------------------|
|                |                     | SP_0293 Thr75Pro<br>SP_1206 Gly64*<br>SP_1196 C→T<br>SP_1905 C→T                                           | hypothetical protein<br>XseB, exodeoxyribonuclease VII small subunit<br>degenerate transposase<br>degenerate transposase                                                              |                                                             |
| s.gal # 1-1    | <i>manLMN::spec</i> | C→T 2 bp upstream of SP_2173                                                                               | DltD, lipoteichoic acid synthesis                                                                                                                                                     | Kovacs <i>et al.</i> ,<br>2006                              |
| s.gal # 2-1    | <i>manLMN::spec</i> | SP_2176 Glu67*<br>SP_0293 Thr75Pro<br>SP_1206 Gly64*<br>SP_1196 C→T<br>SP_1905 C→T                         | DltA, lipoteichoic acid synthesis<br>hypothetical protein<br>XseB, exodeoxyribonuclease VII small subunit<br>degenerate transposase<br>degenerate transposase                         | Kovacs <i>et al.</i> ,<br>2006                              |
| s.gal # 2-4    | <i>manLMN::spec</i> | SP_0151 Val323fs<br>C→T 2 bp upstream of SP_2173                                                           | ABC transporter ATP binding protein<br>DltD, lipoteichoic acid synthesis                                                                                                              | Kovacs <i>et al.</i> ,<br>2006                              |
| s.GlcNAc # 1-2 | <i>manLMN::spec</i> | SP_0436 C→A (synonymous)<br>SP_0577 Met107Ile<br>SP_1733 Glu92*                                            | GatB, Asn/Gln-tRNA formation<br>β-glucoside PTS EIIABC<br>putative phosphatase                                                                                                        | Bidossi <i>et al.</i> ,<br>2011                             |
| s.GlcNAc # 2-4 | <i>manLMN::spec</i> | SP_0058 Ile9Arg                                                                                            | GntR family transcriptional repressor                                                                                                                                                 | Fleming <i>et al.</i> ,<br>2015                             |
| s.GlcN # 1-2   | <i>manLMN::spec</i> | SP_0927 Pro103Leu<br>SP_0577 His534Tyr<br>SP_0293 Thr75Pro<br>SP_1206 Gly64*<br>SP_1196 C→T<br>SP_1905 C→T | SmrC, transcriptional regulator<br>β-glucoside PTS EIIABC<br>hypothetical protein<br>XseB, exodeoxyribonuclease VII small subunit<br>degenerate transposase<br>degenerate transposase | Lau <i>et al.</i> , 2001<br>Bidossi <i>et al.</i> ,<br>2011 |
| s.GlcN # 2     | <i>manLMN::spec</i> | SP_0293 Thr75Pro<br>SP_0577 His534Tyr<br>SP_1206 Gly64*<br>SP_1196 C→T<br>SP_1905 C→T                      | hypothetical protein<br>LicT, transcriptional antiterminator<br>XseB, exodeoxyribonuclease VII small subunit<br>degenerate transposase<br>degenerate transposase                      |                                                             |
| s.GlcN # 2-3   | <i>manLMN::spec</i> | SP_0577 His519Asn                                                                                          | β-glucoside PTS EIIABC                                                                                                                                                                | Bidossi <i>et al.</i> ,<br>2011                             |

|              |                     |                                                                                                                                            |                                                                                                                                                                                                       |                                                                                          |
|--------------|---------------------|--------------------------------------------------------------------------------------------------------------------------------------------|-------------------------------------------------------------------------------------------------------------------------------------------------------------------------------------------------------|------------------------------------------------------------------------------------------|
|              |                     | SP_1356 Glu334*<br>T→G 32bp upstream of SP_1798                                                                                            | chlorohydrolase<br>ABC transporter permease                                                                                                                                                           |                                                                                          |
| s.GlcN # 1-1 | <i>manLMN::spec</i> | SP_0927 Ser138Ile<br>SP_0576 Pro117Leu                                                                                                     | SmrC, transcriptional regulator<br>LicT, transcriptional antiterminator                                                                                                                               | Lau <i>et al.</i> , 2001                                                                 |
| s.fru # 3-1  | <i>manLMN::spec</i> | SP_0577 Ser471*<br>C→A 16bp upstream of SP_0835<br>SP_0877 Phe44Ser,<br>SP_1084 synonymous C→A                                             | β-glucoside PTS EIIABC<br>purine nucleoside phosphorylase<br>fru PTS EIIABC<br>methionine aminopeptidase                                                                                              | Bidossi <i>et al.</i> , 2011<br>Bidossi <i>et al.</i> , 2011                             |
| s.fru # 1    | <i>manLMN::spec</i> | SP_0877 Ser442*<br>SP_0195 TER (TGA→TGG), SP_0196<br>Asn6Lys                                                                               | fru PTS EIIABC<br>hypothetical proteins                                                                                                                                                               | Bidossi <i>et al.</i> , 2011                                                             |
| s.fru # 1-1  | <i>manLMN::spec</i> | SP_0151 Gln97His,<br>6bp deletion in SP_1177 (f= 65% )<br>SP_1383 Val473Ile<br>SP_1859 Leu142Arg<br>SP_2017 Gly377Cys<br>SP_2223 Thr194Ile | ABC transporter ATP binding protein<br>HPr, PTS phosphocarrier protein<br>AlaS, alanyl tRNA-synthetase<br>PnuC-like, ribosyl nicotinamide transporter<br>hypothetical protein<br>hypothetical protein | Bidossi <i>et al.</i> , 2011                                                             |
| s.fru # 1-3  | <i>manLMN::spec</i> | SP_0152 Trp145*<br>SP_0585 Leu90Phe<br>polymorphism 33nts 3' of SP_1177<br>10 bp deletion 5' of SP_1895                                    | ABC transporter permease<br>homocysteine methyltransferase<br>HPr , PTS phosphocarrier protein<br>raffinose ABC transporter permease                                                                  | Bidossi <i>et al.</i> , 2011<br>Rosenow <i>et al.</i> , 1999                             |
| s.fru # 2    | <i>manLMN::spec</i> | SP_0877 Ala223Asp<br>SP_1306 synonymous mutation                                                                                           | fru PTS EIIABC<br>glutamate dehydrogenase                                                                                                                                                             | Bidossi <i>et al.</i> , 2011                                                             |
| s.fru # 2-1  | <i>manLMN::spec</i> | G→T 162 bp upstream of SP_0086<br>SP_0927 Thr245Ile<br>SP_1177 in frame deletion of Ala70 –<br>Asp71 (ΔCATCTG)<br>SP_1897 CCTTC→GAGTAC     | mobile genetic element<br>SmrC, transcriptional regulator<br>HPr, PTS phosphocarrier protein<br>raffinose ABC transporter sugar-binding protein                                                       | Lau <i>et al.</i> , 2001<br>Bidossi <i>et al.</i> , 2011<br>Rosenow <i>et al.</i> , 1999 |

|          |                     |                   |                        |                                 |
|----------|---------------------|-------------------|------------------------|---------------------------------|
| s.fru #4 | <i>manLMN::spec</i> | SP_0293 Thr75Pro  | hypothetical protein   | Bidossi <i>et al.</i> ,<br>2011 |
|          |                     | SP_0877 Gly177Val | fru PTS EIIABC         |                                 |
|          |                     | SP_1196 C→T       | degenerate transposase |                                 |
|          |                     | SP_1905 C→T       | degenerate transposase |                                 |

This chart shows the mutations identified by whole genome sequencing forty suppressor isolates. The predicted consequence of each mutation and the predicted/verified function of the encoded protein are listed. The suppressor names are as follows: gal; selection on galactose medium, lac; selection on lactose medium, GlcN; selected on GlcN medium, GlcNAc; selected on GlcNAc medium, and fru; selected on fructose medium. “s.” denotes suppressors in the *manLMN::spec* background. The CHESHIRE cassette used to replace the *manLMN* open reading frame is indicated by *CHESH*. Suppressor # indicates the biological replicate culture from which it arose. “f” indicates the frequency of a given mutation in the sequencing reads aligned to that genomic region. \* indicates nonsense mutations.

<sup>a</sup>References are provided for protein functions verified *S. pneumoniae*.

## References

- Afzal, M., Shafeeq, S., and Kuipers, O.P. (2014) LacR is a repressor of *lacABCD* and LacT is an activator of *lacTFEG*, constituting the *lac* gene cluster in *Streptococcus pneumoniae*. *Appl Environ Microbiol* **80**: 5349–58.
- Agarwal, V., Kuchipudi, A., Fulde, M., Riesbeck, K., Bergmann, S., and Blom, A.M. (2013) *Streptococcus pneumoniae* endopeptidase O (PepO) is a multifunctional plasminogen- and fibronectin-binding protein, facilitating evasion of innate immunity and invasion of host cells. *J Biol Chem* **288**: 6849–6863.
- Bidossi, A., Mulas, L., Decorosi, F., Colomba, L., Ricci, S., Pozzi, G., *et al.* (2012) A Functional genomics approach to establish the complement of carbohydrate transporters in *Streptococcus pneumoniae*. *PLoS One* **7**: e33320.
- Fleming, E., Lazinski, D.W., and Camilli, A. (2015) Carbon catabolite repression by seryl phosphorylated HPr is essential to *Streptococcus pneumoniae* in carbohydrate rich environments. *Mol Microbiol* **97**: 360–380.
- Jeong, J.K., Kwon, O., Lee, Y.M., Oh, D.-B., Lee, J.M., Kim, S., *et al.* (2009) Characterization of the *Streptococcus pneumoniae* BgaC protein as a novel surface beta-galactosidase with specific hydrolysis activity for the Galβ1-3GlcNAc moiety of oligosaccharides. *J Bacteriol* **191**: 3011–23.
- Kolkman, M., Wakarchuk, W., Nuijten, P., and Zeijst, B. van der (1997) Capsular polysaccharide synthesis in *Streptococcus pneumoniae* serotype



14: molecular analysis of the complete *cps* locus and identification of genes encoding glycosyltransferases required for the biosynthesis of the tetrasaccharide subunit. *Mol Microbiol* **26**: 197–208.

Kovács, M., Halfmann, A., Fedtke, I., Heintz, M., Peschel, A., Vollmer, W., *et al.* (2006) A functional *dlt* operon, encoding proteins required for incorporation of D-alanine in teichoic acids in Gram-positive bacteria, confers resistance to cationic antimicrobial peptides in *Streptococcus pneumoniae*. *J Bacteriol* **188**: 5797–5805.

Lacks, S.A. (1968) Genetic regulation of maltosaccharide utilization in pneumococcus. *Genetics* **60**: 685–706.

Lau, G.W., Haataja, S., Lonetto, M., Kensit, S.E., Marra, A., Bryant, A.P., *et al.* (2001) A functional genomic analysis of type 3 *Streptococcus pneumoniae* virulence. *Mol Microbiol* **40**: 555–571.

Manso, A.S., Chai, M.H., Attack, J.M., Furi, L., Croix, M.D.S., Haigh, R., *et al.* (2014) A random six-phase switch regulates pneumococcal virulence via global epigenetic changes. *Nat Commun* **5**: 1–9.

Martin, C., Briese, T., and Hakenbeck, R. (1992) Nucleotide sequences of genes encoding penicillin-binding proteins from *Streptococcus pneumoniae* and *Streptococcus oralis* with high homology to *Escherichia coli* penicillin-binding proteins 1A and 1B. *J Bacteriol* **174**: 4517–4523.

Obert, C., Sublett, J., Kaushal, D., Hinojosa, E., Barton, T., Tuomanen, E.I., and Orihuela, C.J. (2006) Identification of a candidate *Streptococcus pneumoniae* core genome and regions of diversity correlated with invasive pneumococcal disease. *Infect Immun* **74**: 4766–77.

Puyet, A., Ibañez, M., and Espinosa, M. (1993) Characterization of the *Streptococcus pneumoniae* maltosaccharide regulator MalR, a member of the LacI-GalR family of repressors displaying distinctive genetic features. *J Biol Chem* **268**: 25402–25408.

Rosenow, C., Maniar, M., and Trias, J. (1999) Regulation of the alpha-galactosidase activity in *Streptococcus pneumoniae*: characterization of the raffinose utilization system. *Genome Res* **9**: 1189–97.

Stülke, J., Martin-Verstraete, I., Zagorec, M., Rose, M., Klier, A., and Rapoport, G. (1997) Induction of the *Bacillus subtilis* *ptsGHI* operon by glucose is controlled by a novel antiterminator, GlcT. *Mol Microbiol* **25**: 65–78.

**Supplemental table 3. Primers used in this study**

| <b>Primer</b>                                       | <b>Sequence (5' to 3')</b>                                                                                                               | <b>Application</b>                                                       |
|-----------------------------------------------------|------------------------------------------------------------------------------------------------------------------------------------------|--------------------------------------------------------------------------|
| manLMN_F<br>manLMN_R                                | TGCCGTACAGTGAAAAATGCT<br>AGATGGCGGTCAATGGGA                                                                                              | SOE PCR for $\Delta$ manLMN mutations                                    |
| manLMNspec_Fmid<br>manLMNspec_Rmid                  | TAAATAACAGATTAAAAAAATTATAATAATCAAGCAACTAAAAAGGAACC<br>AGGT<br>GGGATCCACTAGTTCTAGAGCGCATTCCCTCCTTTTTTGTTTTAGTTTTCA                        | SOE PCR for manLMN::spec                                                 |
| manLMNcheshire_Fmid<br>manLMNcheshire_Rmid          | GGTATCGACCATGGCCCCTAATCAAGCAACTAAAAAGGAACCAG<br>ACGGTAAGCCAACGCGTCCCCCATTATTGTCATTCCCTCCTTTTTTGTTTTAG                                    | SOE PCR for manLMN::CHESHIRE                                             |
| manLMN_F0<br>manLMN_R0                              | GCCTTAAAGTCGGTGACCGCGT<br>CAAGCCCACACTTTCTTCTGG                                                                                          | $\Delta$ manLMN strains sequence verification                            |
| Spec5'_R0<br>Spec3'_F0                              | CCACGGTACCATTTCTTGCTGAATAA<br>GATGTGAGAAGAGCCATTATGGATTCCG                                                                               | spec <sup>R</sup> strains sequence verification                          |
| Cheshire_F<br>Cheshire_R                            | GGGACGCGTTGGCTTAC<br>GGGGCCATGGTCGATACC                                                                                                  | CHESHIRE cassette cloning and resolved strain sequence verification      |
| SP1773_F<br>SP_1773_R<br>SP1773_Fmid<br>SP1773_Rmid | ACACCAAGTTGCCCAGAAG<br>GCCAGAAAAACAGCAGCA<br>GGTATCGACCATGGCCCCTGAAAGAATAATTATGCATAAAAAATAGGAATA<br>TAAAC<br>GACCATGCTTATTTTAAACTAAGCAAC | SOE PCR for complementation <i>in trans</i> strains in the SP_1773 locus |
| SP1773_F0<br>SP1773_R0                              | ACACCAAGTTGCCCAGAAG<br>ACCGAATCTACACCTTCACCTG                                                                                            | complementation <i>in trans</i> strains sequence verification            |
| manLMNcomp_R                                        | GTAAGCCAACGCGTCCCCAAGCATAGAAAAAAGGAATCAGATTTTAGAAC                                                                                       | SOE PCR for manLMN complementation <i>in trans</i>                       |
| manLcomp_R                                          | GTAAGCCAACGCGTCCCCTTATTTGACATTGGCTTTGTTAATCAAGTC                                                                                         | SOE PCR for manL complementation <i>in trans</i>                         |
| manL(MN)comp_F                                      | GTTGCTTAGTTTTAAAATAAGCATGGTCTCTAATAGAAACCTATTTTAAAAG<br>TTGGAAGC                                                                         | SOE PCR for manLMN and manL complementation <i>in trans</i>              |
| SP_0061_F<br>SP_0061_R                              | GGAGTTCTGGGATGGTTGGT<br>ACGGGCAAGACTAGATACT                                                                                              | SOE PCR for SP_0061-3::cat                                               |

|                                                 |                                                                                                                                                                   |                                                      |
|-------------------------------------------------|-------------------------------------------------------------------------------------------------------------------------------------------------------------------|------------------------------------------------------|
| SP_0061_Fmid                                    | CCTAATGACTGGCTTTTATAATAATACTCTTCGAAAATCTCTCAAAC TAC                                                                                                               |                                                      |
| SP_0061_Rmid                                    | CTTCCAATTGTCTAAATCAATTTTATTAAGTTCATTGTCATAAGTTTTCCC<br>CCTTTATATGTTTTAG                                                                                           |                                                      |
| SP0061_F0<br>SP_0061_R0                         | GGCGAGCTACTCTGAAAGCT<br>GGACCAGCGCCTAGATAGA                                                                                                                       | <i>SP_0061-3::cat</i> strain sequence verification   |
| SP_1185_F<br>SP_1185_R                          | AGGGAGAAGAGGTGATTGTAATTGGT<br>GGATGATATCTTCCAACCTCAGCTGCACG                                                                                                       |                                                      |
| SP_1185_Fmid                                    | AGGCCTAATGACTGGCTTTTATAATAAGGCTAGAGACTCTGAAATAGTCTC                                                                                                               | SOE PCR for <i>SP_1185-6::cat</i>                    |
| SP_1185_Rmid                                    | ATACCGTCGACCTCGAGATCCATGATAGAATTCTCCTTATATAGTTTTAAA<br>TAAATTTTTATG                                                                                               |                                                      |
| SP_1185_F0<br>SP_1185_R0                        | ATTAGGCATGATCACAGGTG<br>CCAAACTACCACCATTGACT                                                                                                                      | <i>SP_1185-6::cat</i> strain sequence verification   |
| fruA_F<br>fruA_R<br>fruA_Fmid<br>fruA_Rmid      | AGTCACACTCAATCCATCCA<br>ACCAAATAGACCACGTTTCTCA<br>GAAGGTTTTTATATTACAGCTCCAAAAATAGAAAAATGAAAAGATTGGAC<br>CG<br>TACCGTCGACCTCGAGATCTCATCGTTTTTCTACCTCAACTTTTC       | SOE PCR for <i>fruA::cat</i>                         |
| fruA_F0<br>fruA_R0                              | AGCTCTTGACAGGTTATTAAGG<br>TTATGGTTTTCGATCGTTTCC                                                                                                                   | <i>fruA::cat</i> strain sequence verification        |
| cat5'_R0<br>cat3'_F0                            | ATCCAATTTTCGTTTGTGAACC<br>CCGCTATCTTTACAGGTACATC                                                                                                                  | <i>cat<sup>R</sup></i> strains sequence verification |
| ciaR_F<br>ciaR_R<br>ciaR_Fmid<br>ciaR_Rmid      | GATTCAGCCCTTGAGCG<br>CCGAAGCAATCATCTCGTAG<br>TAAATAACAGATTAAAAAAATTATAAGGGTATCTTTTAAAAGATGTTTCAGT<br>AAAC<br>GGGATCCACTAGTTCTAGAGAGAAACTCCTCCTTATTA AAACTATTATACC | SOE PCR for <i>ciaR::spec</i>                        |
| ciaR_F0<br>ciaR_R0                              | CGTCGTTTGTGGCTGAG<br>CAGAAGAAGCTGATCTGTGAC                                                                                                                        | <i>ciaR::spec</i> strain sequence verification       |
| agalfusion_F<br>agalfusion_R<br>agalfusion_Rmid | AGGATTTGGTAGACAGCTTGG<br>TGCCAAACCAACCATCATCTAA<br>TGAAGAAGGTTTTTATATTACAGCTCCATTACTTCACCTCATCACTTTATTG<br>ATTATATT                                               | SOE PCR for $\alpha$ -galactosidase reporter strains |

|                                          |                                                                                                                                             |                                                                     |
|------------------------------------------|---------------------------------------------------------------------------------------------------------------------------------------------|---------------------------------------------------------------------|
| agalfusion_Fmid                          | ATGGGAGTTAGGATAGAGAATAATCTATTTT                                                                                                             |                                                                     |
| agalfus-PlacA_F<br>agalfus-PlacA_R       | CGATACCGTCGACCTCGAGATCAAAAAGTAAAAAATAAATAACAAAAACAA<br>ACAAAAGCTGTTG<br>AAAATAGATTATTCTCTATCCTAACTCCCATATTGTATACTCCTTTTTATTT<br>TTTCTATGCTG | SOE PCR for <i>PlacA</i> $\alpha$ -galactosidase<br>reporter strain |
| agalfus-PnagB_F<br>agalfus-PnagB_R       | CGATACCGTCGACCTCGAGATCATATTTGTTCATTCTTTCTAAGTTCTAATC<br>CTATCC<br>ATAGATTATTCTCTATCCTAACTCCCATCTTTTCATCCTCCATTTTTGTCTAT<br>ATTTATT          | SOE PCR for <i>PnagB</i> $\alpha$ -galactosidase<br>reporter strain |
| agalfus-PfruR_F<br>agalfus-PfruR_R       | CGATACCGTCGACCTCGAGATCTTGAGTAATCTTCCAATACTTACTCAAAT<br>AGT<br>AAAATAGATTATTCTCTATCCTAACTCCCATTTGAATCACCTCCTGTTATCGT<br>T                    | SOE PCR for <i>PfruR</i> $\alpha$ -galactosidase<br>reporter strain |
| agalfusion_F0<br>agalfusion_R0           | GCTGTTTCGGCTTAGGGAT<br>AGTCCAAACTGCAAACCT                                                                                                   | $\alpha$ -galactosidase reporter strains sequence<br>verification   |
| SP_0061-3comp_Fmid<br>SP_0061-3comp_Rmid | CTAAAACAAAAAAGGAGGAATGACAATAATGACAATTGTAGGATGCCGTA<br>TTG<br>GTAAGCCAACGCGTCCCCTTATTCATCTTCGTCATCATCGAAGC                                   | SOE PCR for GlcNAc/gal PTS<br>complementation <i>in trans</i>       |
| SP_1185-6comp_Fmid<br>SP_1185-6comp_Fmid | CTAAAACAAAAAAGGAGGAATGACAATAATGAATAGAGAAGAAGTAACA<br>TTGTTAGG<br>GTAAGCCAACGCGTCCCCTTAATCGAATTGCGCTTGTACG                                   | SOE PCR for lac PTS complementation <i>in<br/>trans</i>             |
| SP_fruAcomp_Fmid<br>SP_fruAcomp_Fmid     | CTAAAACAAAAAAGGAGGAATGACAATAATGAAAATTCAAGACCTATTGA<br>GAAAAGATG<br>GTAAGCCAACGCGTCCCCTTATGCTTGTGGTTTGCCTAG                                  | SOE PCR for fru PTS complementation <i>in<br/>trans</i>             |
| Pman_R                                   | TATTGTCATTCCCTTTTTTTGTTTTAG                                                                                                                 | SOE PCR for PTS complementation <i>in<br/>trans</i> strains         |
| SP_00613'_F                              | TGATATTGACCTTTACGCAGGG                                                                                                                      | GlcNAc/gal PTS comp. <i>in trans</i> sequence<br>verification       |
| SP_1186-3'_F                             | TGATCTTGTTATCCTTGCCCCT                                                                                                                      | lac PTS comp. <i>in trans</i> sequence<br>verification              |
| fruA3'_F                                 | AGTAGCAGGTGGACTCGT                                                                                                                          | fru PTS comp. <i>in trans</i> sequence<br>verification              |
| SP_0451_F<br>SP_0451_R<br>SP_0451_Fmid   | GCCAGAAATGGAAGAGCG<br>CCTCACCTTACCGTAACAC<br>AGGCCTAATGACTGGCTTTTATAATAATCTTTGGATAACGGCGGAT                                                 | SOE PCR for <i>SP_0451::cat</i>                                     |

|                                                      |                                                                                                                                                                  |                                                           |
|------------------------------------------------------|------------------------------------------------------------------------------------------------------------------------------------------------------------------|-----------------------------------------------------------|
| SP_0451_Rmid                                         | TACCGTCGACCTCGAGATCAGCCATGTTTTTCTCCTATTTTCTTC                                                                                                                    |                                                           |
| SP_0451_F0<br>SP_0451_R0                             | TGGTAGGTGTCGATGAGGG<br>GTAACATCCTACCTGCAACTGG                                                                                                                    | <i>SP_0451::cat</i> strain sequence verification          |
| SP_1473_F<br>SP1473_R<br>SP_1473_Fmid<br>SP1473_Rmid | AGTTGACCTTGCTCGTGC<br>TCACCAACGAAGGCACTG<br>AGGCCTAATGACTGGCTTTTATAATAATAATACTCTTCGAAAATCAAATTC<br>AAACCAC<br>ATACCGTCGACCTCGAGATCTTCTTCTCCTTTGTAATAAGATAAAGTCCG | SOE PCR for <i>SP_1473::cat</i>                           |
| SP_1473_F0<br>SP1473_R0                              | CGTACGGGTCAAATCACTGT<br>GATGCTCCAGGTGTTAATGC                                                                                                                     | <i>SP_1473::cat</i> strain sequence verification          |
| rplI_FqRT<br>rplI_RqRT                               | CGACCATCTGGACCAACTTT<br>CTAGCCAAAGAAGCGACTGC                                                                                                                     | For qRT-PCR of housekeeping gene <i>rplI</i><br>(SP_2204) |
| SP_0061_FqRT<br>SP_0061_RqRT                         | CTCGTAAACCAGACCGCTTC<br>CATTTGGAACCATCTGAGCA                                                                                                                     | For qRT-PCR SP_0061                                       |
| SP_1186_FqRT<br>SP_1186_RqRT                         | GCTGCTGAAGCTGGTGATTT<br>GCCATGCATCATGGTTACAC                                                                                                                     | For qRT-PCR of SP_1186                                    |
